# Supplementary material for: Establishment and Investigation of a Multiple Gene Expression Signature to Predict Long‐Term Survival in Pancreatic Cancer
Source: Hindawi journal article supplement (doi:10.1155/2020/1570862), 2020-01-01
Supplement: f1 [file 1570862.f1.pdf]

**Supplementary Table 1.** Univariate and multivariate Cox analysis in external three independent datasets.

| Variable                            | GSE57495 Cohort |             |                  |              |                  | Bailey2016 Cohort |            |                  |              |                       | GSE62452 Cohort |            |                  |              |                  |
|-------------------------------------|-----------------|-------------|------------------|--------------|------------------|-------------------|------------|------------------|--------------|-----------------------|-----------------|------------|------------------|--------------|------------------|
|                                     | Univariate      |             |                  | Multivariate |                  | Univariate        |            |                  | Multivariate |                       | Univariate      |            |                  | Multivariate |                  |
|                                     | N               | P           | HR(95% CI)       | P            | HR (95%CI)       | N                 | P          | HR(95 %CI)       | P            | HR(95% CI)            | N               | P          | HR(95% CI)       | P            | HR(95% CI)       |
| <b>AJCC stage I-IIA vs IIB-IV</b>   | 30/33           | <b>0.00</b> | 2.34(1.2-3-4.43) | <b>0.00</b>  | 2.47 (1.29-4.70) | 34/62             | <b>0.0</b> | 2.04 (1.15-3.62) | <b>0.00</b>  | 2.42(1.2-9-4.54)      | 14/52           | 0.1        | 1.73 (0.85-3.53) | 0.0          | 1.94 (0.92-4.12) |
| <b>T stage T1/T2 vs T3/T4</b>       |                 |             |                  |              |                  |                   |            |                  |              |                       |                 |            |                  |              |                  |
| <b>N stage N0 vs N+</b>             |                 |             |                  |              |                  |                   |            |                  |              |                       |                 |            |                  |              |                  |
| <b>Grade G1/G2 vs G3/G4</b>         |                 |             |                  |              |                  | 57/36             | <b>0.0</b> | 1.88(1.1-3-3.14) | <b>0.04</b>  | 1.74(1.0-2-2.99)      | 34/31           | <b>0.0</b> | 2.02(1.1-2-3.67) | 0.0          | 1.76(0.9-4-3.29) |
| <b>Gender Female vs Male</b>        |                 |             |                  |              |                  | 47/49             | 0.7        | 1.08(0.6-6-1.78) |              | 1.08(0.6-0.75 4-1.83) |                 |            |                  |              |                  |
| <b>Age(years) &gt;60 vs &lt;=60</b> |                 |             |                  |              |                  | 67/29             | 0.4        | 0.81(0.4-7-1.38) |              | 1.14(0.6-0.64 4-2.04) |                 |            |                  |              |                  |
| <b>Signature High vs Low risk</b>   | 28/35           | <b>0.04</b> | 1.86(1.0-3.43)   | <b>0.02</b>  | 1.99(1.0-7-3.69) | 86/10             | <b>0.0</b> | 2.61( 0.94-7.25) |              | 2.84(1.0-8.05)        | 51/15           | <b>0.0</b> | 3.24 (1.46-7.18) | <b>0.0</b>   | 2.38 (1.01-5.59) |

**Table S2.** Stratified Survival analysis of clinical clinicopathological characteristics of training and validation cohorts

|                              |               | <b>Logrank<br/>P_value</b> | <b>High/Low</b> | <b>MST(High/Low)</b> | <b>MST(95%CI)</b>    | <b>HR(95%CI)</b> |
|------------------------------|---------------|----------------------------|-----------------|----------------------|----------------------|------------------|
| <b>Training<br/>(TCGA)</b>   | <b>Cohort</b> |                            |                 |                      |                      |                  |
|                              | OS            | <b>&lt;0.0001</b>          | 67/110          | 15.6/24.6            | 11.1-19.9/20.5-NA    | 2.46 (1.62-3.73) |
|                              | DFS           | <b>0.045</b>               | 56/98           | 18.5/40.3            | 12.1-NA/19.8-NA      | 1.73( 1-2.98)    |
|                              | Stage I-IIA   | 0.11                       | 13/35           | 19.9/72.7            | NA/9.97-NA           | 2.19(0.83-5.78)  |
|                              | Stage IIB-IV  | <b>0.001</b>               | 54/71           | 15.3/20.9            | 10.3-19.8/17.7-NA    | 2.12(1.34-3.37)  |
|                              | pN+           | <b>0.003</b>               | 51/67           | 15.3/20.5            | 9.23-20.2/17.23-35.3 | 2.04(1.27-3.28)  |
|                              | pN-           | 0.08                       | 14/36           | 19.9/72.7            | 13.1-NA/NA           | 2.35(0.9-6.13)   |
|                              | pT1/2         | 0.7                        | 5/26            | 19.9/NA              | 5.33-NA/17.73-NA     | 1.35(0.29-6.39)  |
|                              | pT3/4         | <b>0.0001</b>              | 62/82           | 15.5/22              | 10.3-19.8/19.9-NA    | 2.36(1.51-3.69)  |
|                              | G1/G2         | <b>0.00014</b>             | 44/81           | 15.6/50.1            | 11.1-24.4/21.1-NA    | 2.77(1.64-4.69)  |
|                              | G3/G4         | 0.08                       | 23/27           | 15.3/19.7            | 5.1-NA/15.7-NA       | 1.87(0.92-3.79)  |
|                              | Age >60       | <b>0.0071</b>              | 48/71           | 15.5/21.7            | 9.77-24.4/19.87-NA   | 1.97(1.20-3.21)  |
|                              | Age <=60      | <b>0.0006</b>              | 19/39           | 17.3/50.1            | 10.3-NA/50.1-NA      | 3.70(1.662-8.25) |
|                              | Male          | <b>0.0001</b>              | 40/57           | 15.3/72.7            | 9.77-22.8/22.03-NA   | 3.17(1.73-5.80)  |
| Female                       | <b>0.045</b>  | 27/53                      | 15.6/20.1       | 12.5-30.4/16.2-NA    | 1.83(1.01-3.32)      |                  |
| <b>GSE21501 Cohort</b>       | OS            | <b>0.001</b>               | 27/75           | 13/20                | 7-17/18/31           | 2.61(1.47-4.62)  |
|                              | Stage I-IIA   | <b>0.0022</b>              | 4/22            | 7/26                 | 4-NA/22-NA           | 9.04(2.20-37.08) |
|                              | Stage IIB-IV  | 0.08                       | 23/48           | 14/18                | 7-NA/14-25           | 1.76(0.92-3.37)  |
|                              | pN+           | 0.08                       | 23/50           | 14/18                | 7-NA/14-25           | 1.75(0.92-3.32)  |
|                              | pN-           | <b>0.001</b>               | 4/24            | 7/26                 | 4-NA/20-NA           | 9.94(2.42-40.82) |
|                              | pT1/2         | 0.11                       | 4/14            | 9.5/23               | 3-NA/8-NA            | 3.28(0.77-13.87) |
|                              | pT3/4         | <b>0.005</b>               | 23/57           | 13/20                | 7-NA/18-43           | 2.46(1.30-4.65)  |
| <b>Bailey2016<br/>Cohort</b> | OS            | 0.064                      | 86/10           | 16.6/35.8            | 13.8-23.8/15.9-NA    | 2.62(0.94-7.25)  |
|                              | Stage I-IIA   | 0.99                       | 2/32            | 0/30                 | NA/12.9              | NA               |
|                              | Stage IIB-IV  | <b>0.05</b>                | 8/54            | 15/25.8              | 12-20.3/15.8-NA      | 2.8(0.98-8.29)   |
|                              | G1/G2         | 0.143                      | 50/7            | 20.7/50.4            | 14.3-42/35.8-NA      | 2.93(0.69-12.35) |
|                              | G3/G4         | 0.43                       | 33/3            | 13.8/15.8            | 9.5-25.6/13.2-NA     | 1.77(0.42-7.53)  |
|                              | Age >60       | 0.24                       | 59/8            | 17.7/35.8            | 13.7-30/15.8-NA      | 1.84(0.65-5.19)  |
|                              | Age <=60      | 0.9                        | 27/2            | 14.1/NA              | 10.4-31.9/NA         | NA               |
|                              | Male          | 0.12                       | 45/4            | 14.1/50.4            | 11.6-23.8/15.8-NA    | 5.20(0.71-38.2)  |

|                        |              |               |       |           |                    |                  |
|------------------------|--------------|---------------|-------|-----------|--------------------|------------------|
|                        | Female       | 0.32          | 41/6  | 20.3/25.8 | 13.7-34.3/13.2-NA  | 1.86(0.55-6.28)  |
| <b>GSE57495 Cohort</b> | OS           | <b>0.047</b>  | 35/28 | 16.2/31.6 | 13.6-29.1/21.1-NA  | 1.86(1.0-3.43)   |
|                        | Stage I-IIA  | 0.2           | 13/17 | 29.1/NA   | 15.6-NA/30.1/NA    | 1.95(0.69-5.47)  |
|                        | Stage IIB-IV | 0.07          | 15/18 | 13.6/23.2 | 9.93-21.5/16.43-NA | 2.06(0.941-4.49) |
| <b>GSE62452 Cohort</b> | OS           | <b>0.0037</b> | 51/15 | 13.8/45.9 | 11.6-21.9/10.3-NA  | 3.24( 1.46-7.18) |
|                        | Stage I-IIA  | 0.0873        | 10/4  | 13.9/49.7 | 9.5-NA/49.5-NA     | 4.08(0.81-20.52) |
|                        | Stage IIB-IV | <b>0.0474</b> | 41/11 | 13.8/29   | 10.8-21.9/5.9-NA   | 2.57(1.01-6.55)  |
|                        | G1/G2        | <b>0.05</b>   | 22/12 | 21.5/41.6 | 10.9-NA/10.3-NA    | 2.47(0.97-6.29)  |
|                        | G3/G4        | 0.32          | 29/2  | 13.7/25.2 | 9.8-21.3/4.5-NA    | 2.98(0.37-23.24) |
| <b>GSE79668 Cohort</b> | OS           | <b>0.0009</b> | 38/13 | 16.5/96.6 | 10.4-21/18.6-NA    | 4.44(1.84-10.73) |
|                        | Stage IIB-IV | <b>0.043</b>  | 30/8  | 18.9/22.5 | 18.6-NA/10.4-23.2  | 2.7(1.03-7.08)   |
|                        | pN+          | <b>0.044</b>  | 29/9  | 18.7/22.5 | 18.6-NA/10.4-23.3  | 2.68(1.02-7.05)  |
|                        | pT3/4        | 0.122         | 29/7  | 18.1/21.6 | 10.4-21.4/18.4-NA  | 2.13(0.82-5.53)  |

Table S3.

Statistics

|                  | <b>Training (TCGA)<br/>Cohort</b> | <b>GSE21501<br/>Cohort</b> | <b>Bailey2016<br/>Cohort</b> | <b>GSE62452<br/>Cohort</b> | <b>GSE79668<br/>Cohort</b> | <b>GSE57495<br/>Cohort</b> |
|------------------|-----------------------------------|----------------------------|------------------------------|----------------------------|----------------------------|----------------------------|
| Dataset Size     | 177                               | 102                        | 96                           | 69                         | 51                         | 63                         |
| Age (%)          |                                   |                            |                              |                            |                            |                            |
| <=60             | 119(67.2)                         | NA                         | 29(43.3)                     | NA                         | 19(37.3)                   | NA                         |
| >60              | 58(32.7)                          | NA                         | 67(56.7)                     | NA                         | 32(62.7)                   | NA                         |
| Gender (%)       |                                   |                            |                              |                            |                            |                            |
| Male             | 97(54.8)                          | NA                         | 49(51)                       | NA                         | 32(62.7)                   | NA                         |
| Female           | 80(45.2)                          | NA                         | 47(49)                       | NA                         | 19(37.3)                   | NA                         |
| AJCC Stage (%)   |                                   |                            |                              |                            |                            |                            |
| I/IIA            | 49(29.5)                          | 26 (26.8)                  | 34(35.4)                     | 14(21.2)                   | 13(25.5)                   | 30(47.6)                   |
| IIB/III/IV       | 117(70.5)                         | 71(73.2)                   | 62(64.6)                     | 52(78.8)                   | 38(74.5)                   | 33(52.7)                   |
| T stage (%)      |                                   |                            |                              |                            |                            |                            |
| T1/T2            | 31(17.7)                          | 18(18.4)                   | NA                           | NA                         | 15(29.4)                   | NA                         |
| T3/T4            | 144(82.3)                         | 80(81.6)                   | NA                           | NA                         | 36(70.6)                   | NA                         |
| N stage(%)       |                                   |                            |                              |                            |                            |                            |
| N0               | 50(30.1)                          | 28(27.7)                   | NA                           | NA                         | 14(27.5)                   | NA                         |
| N+               | 116(69.9)                         | 73(72.3)                   | NA                           | NA                         | 37(72.5)                   | NA                         |
| Grade(%)         |                                   |                            |                              |                            |                            |                            |
| G1/G2            | 125(70.6)                         | NA                         | 57(59.4)                     | 34(52.3)                   | NA                         | NA                         |
| G3/G4            | 50(29.4)                          | NA                         | 36(30.6)                     | 31(47.7)                   | NA                         | NA                         |
| Death status (%) |                                   |                            |                              |                            |                            |                            |
| Yes              | 92(51.98)                         | 67(65.7)                   | 64(66.7)                     | 50(75.8)                   | 45(88.2)                   | 42(66.7)                   |
| No               | 85(48.02)                         | 35(34.3)                   | 32(33.3)                     | 16(24.2)                   | 6(11.8)                    | 21(33.3)                   |

information of the datasets included in this study

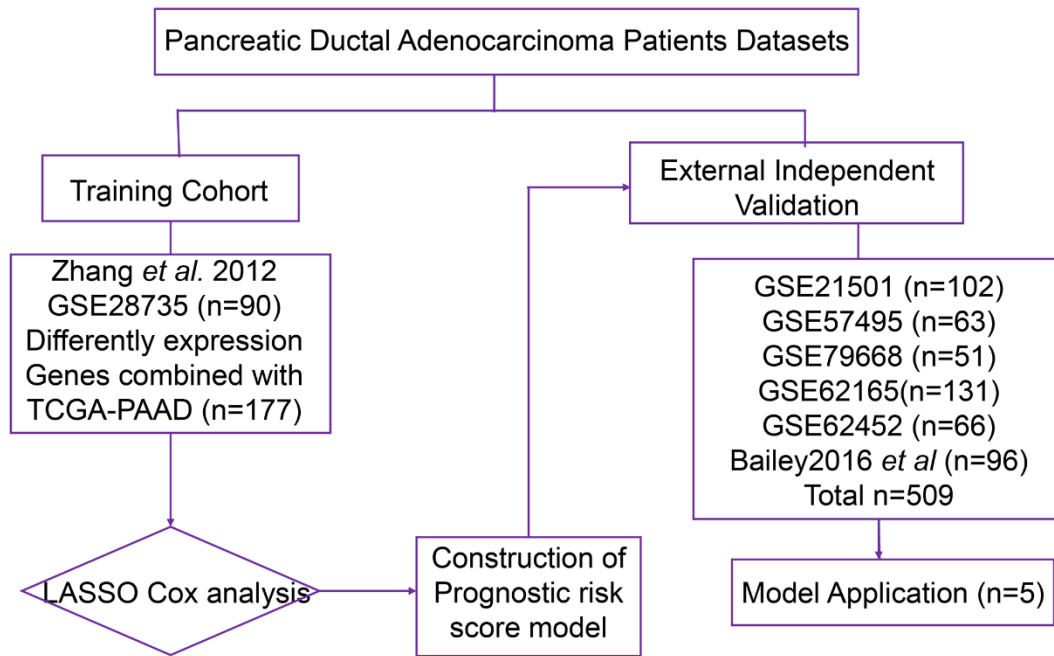

**Supplementary Figure 1.** The workflow of construction and evaluation of our prognostic model.

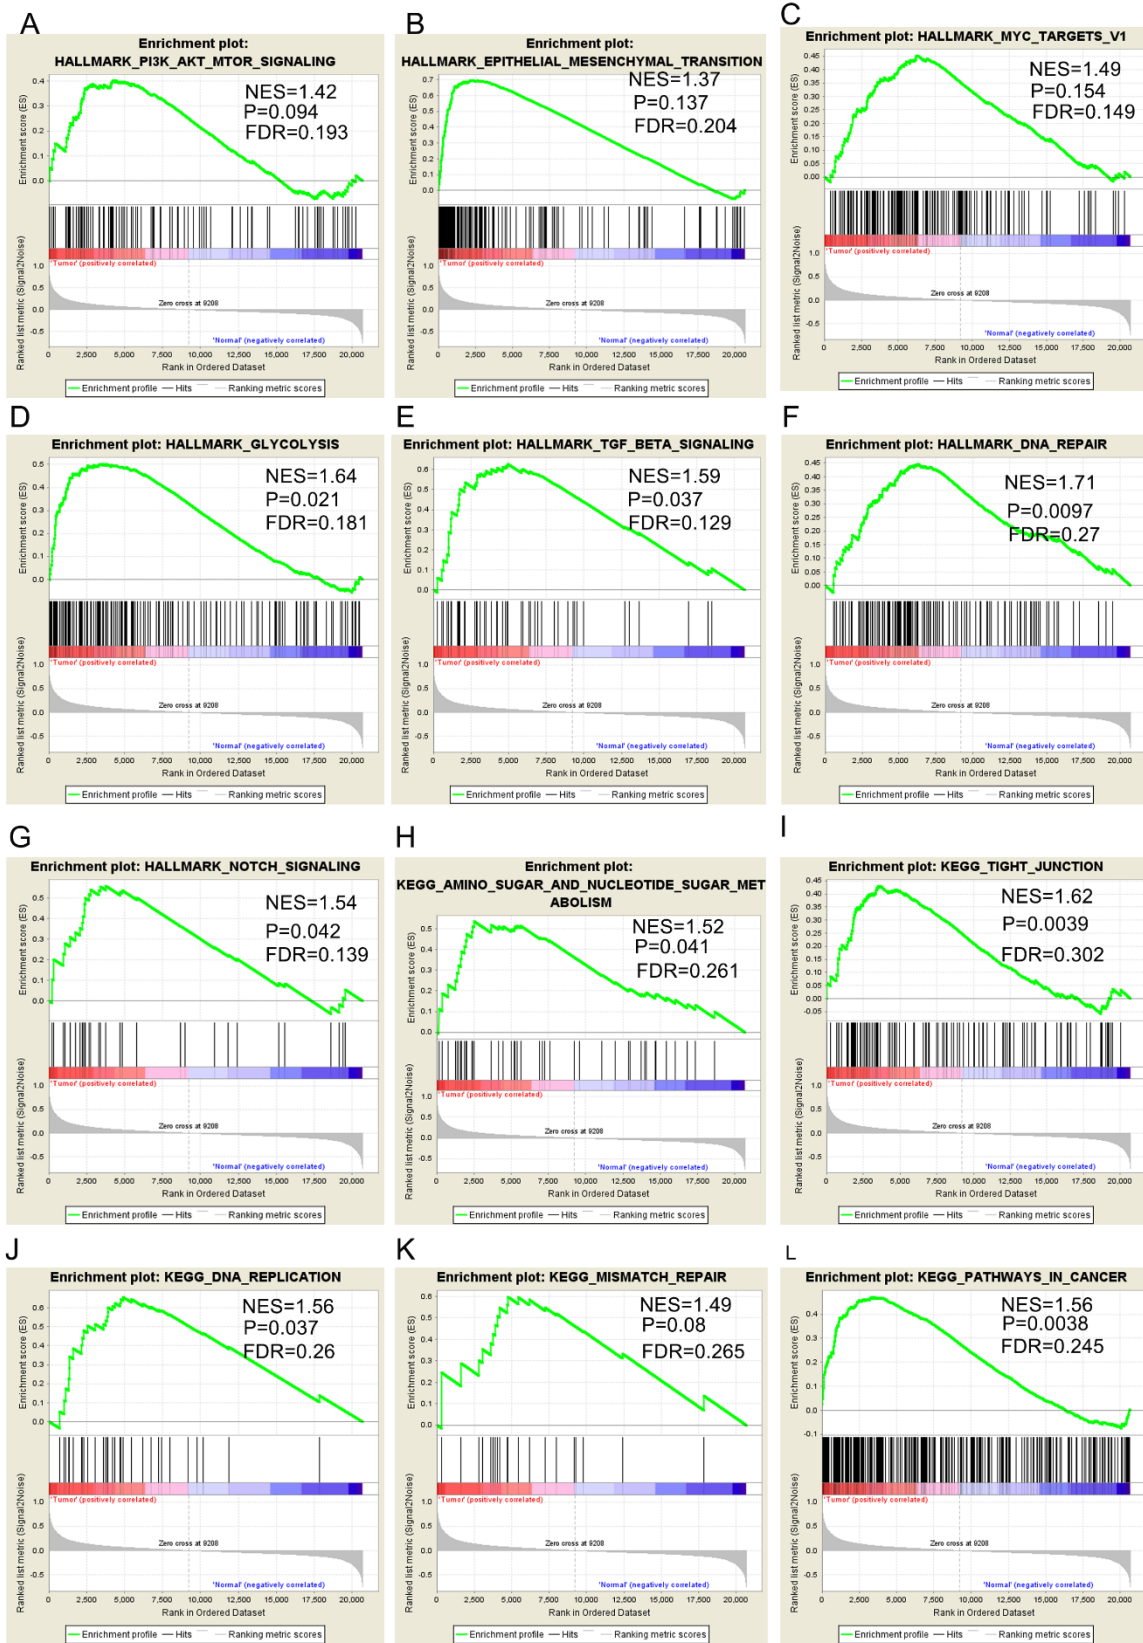

**Supplementary Figure 2.** GSEA analysis of the hallmarks and KEGG pathway between PC and adjacent normal tissues. A-G. the hallmarks enrichment of PC, H-L. KEGG pathway enrichment in PDAC.

A

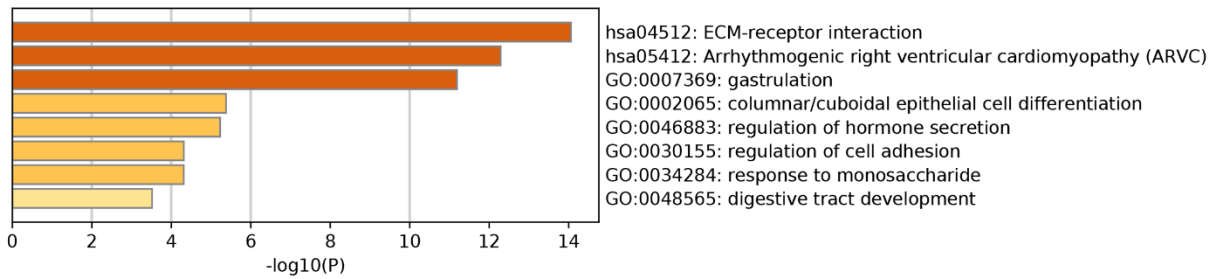

B

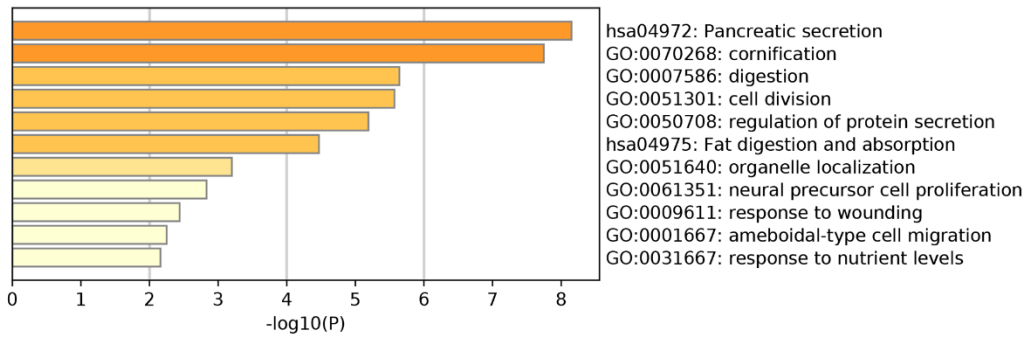

**Supplementary Figure 3.** GO Term and KEGG pathway analysis for five genes related to protein network annotation. A. Cluster 1 contains *COL17A1*, *ITGB6*, *LAMC2*, *S100P*; B. Cluster 2 contains with *CHGA*. The barplot is derived from Metascape online tool.

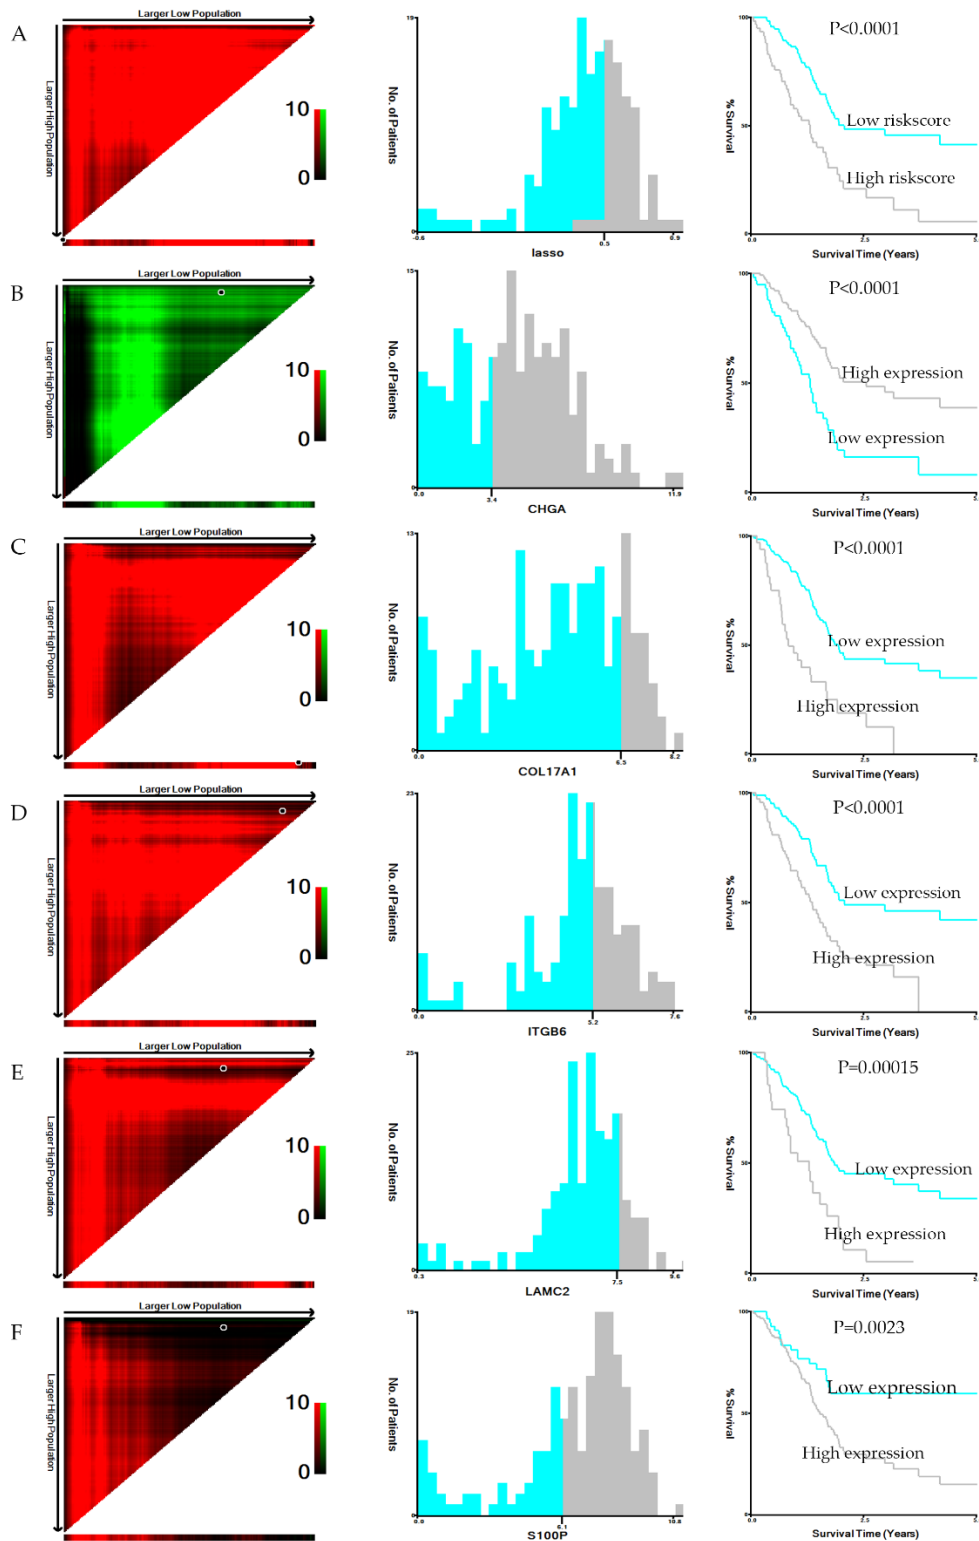

**Supplementary Figure 4.** X-tile plots of the five selected gene expression signatures associated with the overall survival of the patients in the training cohort, and with the LASSO risk values. Red represents inverse association between marker expression and survival, whereas green represents direct association (left panel). The value between green and gray in frequency histograms were the optimized cutoff value of high score and low score or high expression and low expression (median panel); overall survival between four genes and lasso risk score (right panel). High expression and



low expression of indicated gene expression signatures, high or low LASSO risk score derived from optimal cutoff value.

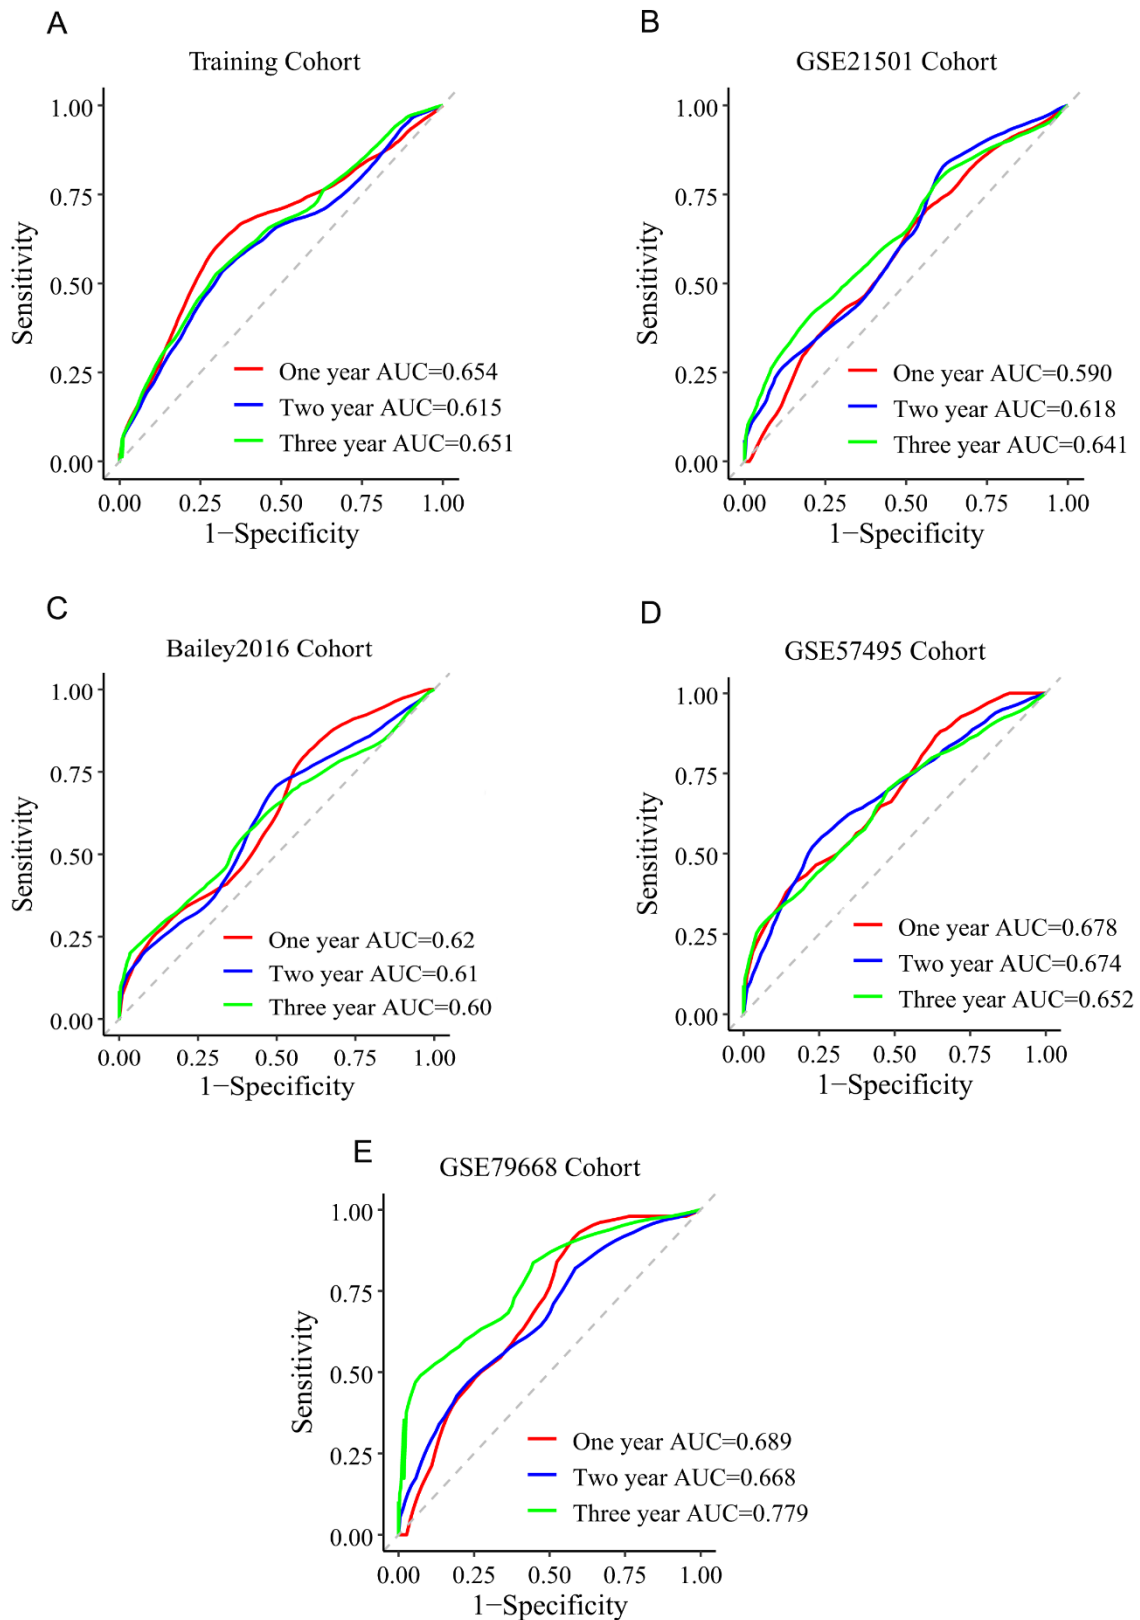

**Supplementary Figure 5.** Evaluation of gene expression signature-based risk score and robustness. Time-dependent ROC curves to assess the prognostic accuracy, AUC at 1, 2, and 3 years were

calculated according to the five-gene expression signature. A. Training cohort, B-E. external independent validation datasets.
